# Supplementary material for: Preparation of Self-Assembled, Curcumin-Loaded Nano-Micelles Using Quarternized Chitosan–Vanillin Imine (QCS-Vani Imine) Conjugate and Evaluation of Synergistic Anticancer Effect with Cisplatin
Source: MDPI journal article supplement (doi:10.3390/jfb14100525), 2023-10-18
Supplement: s1 [file s1]

## Supplementary materials

Preparation of self-assembled curcumin loaded nano-micelles using quarternized chitosan-vanillin imine (QCS-Vani imine) conjugate and evaluation of synergistic anticancer effect with Cisplatin

Figures:

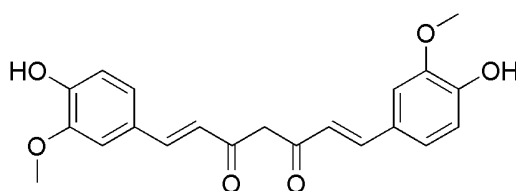

Figure S1: Chemical structure of curcumin.

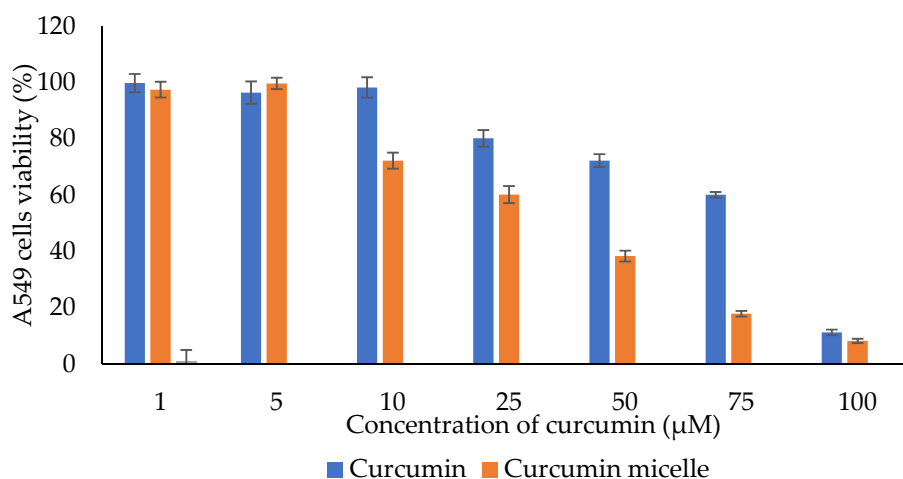

Figure S2: Cell viability of human non-small cell lung cancer cell line (A549) after 24 h treatment with various concentrations of curcumin and curcumin loaded QCS-Vani imine nano-micelles. All the values are expressed as mean  $\pm$  standard deviation ( $n = 3$ ) of curcumin concentrations.

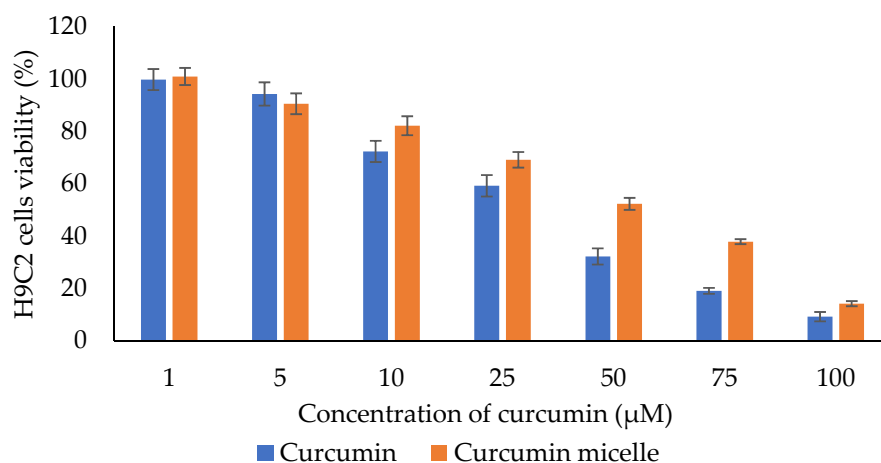

**Figure S3:** Cell viability of rat cardiomyocytes cell line (H9C2) after 24 h treatment with various concentrations of curcumin and curcumin loaded QCS-Vani imine nano-micelles. All the values are expressed as mean  $\pm$  standard deviation ( $n = 3$ ) of curcumin concentrations.

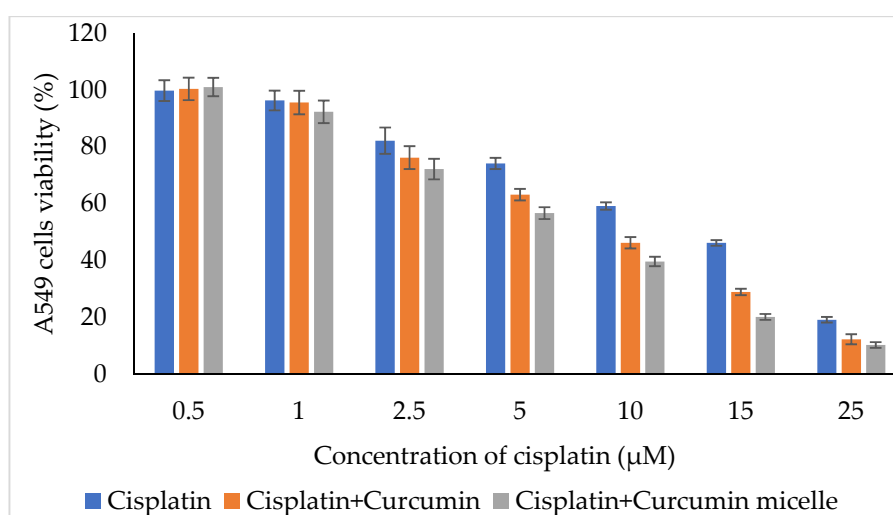

**Figure S4:** Cell viability of human non-small cell lung cancer cell line (A549) after 24 h treatment with various concentrations of cisplatin (in blue), cisplatin co-treatment with curcumin at 5  $\mu$ M ( $IC_5$ ) (in orange), cisplatin co-treatment with curcumin loaded QCS-Vani imine at 5  $\mu$ M ( $IC_5$ ) (in grey). All the values are expressed as mean  $\pm$  standard deviation ( $n = 3$ ) of cisplatin concentrations ( $\mu$ M).

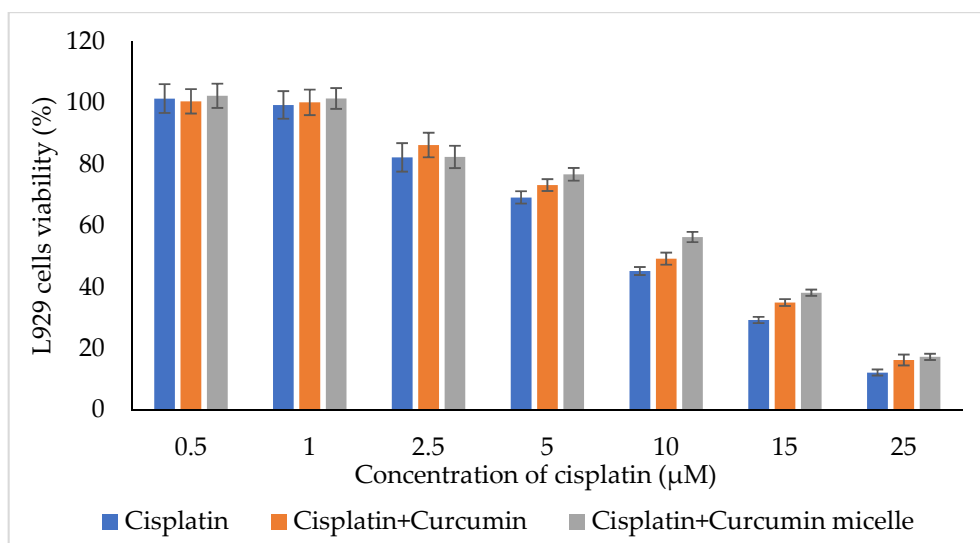

**Figure S5:** Cell viability of mouse fibroblast cell line (L929) after 24 h treatment with various concentrations of cisplatin (in blue), cisplatin co-treatment with curcumin at 5  $\mu$ M ( $IC_5$ ) (in orange), cisplatin co-treatment with curcumin loaded QCS-Vani imine at 5  $\mu$ M ( $IC_5$ ) (in grey). All the values are expressed as mean  $\pm$  standard deviation (n = 3) of cisplatin concentrations ( $\mu$ M).

## Tables

**Table S1.** Concentration ratios of cisplatin to curcumin when various concentrations of cisplatin co-treatment with curcumin at 5  $\mu$ M ( $IC_5$ ) and with curcumin loaded QCS-Vani imine at 5  $\mu$ M ( $IC_5$ ).

| Concentration of cisplatin ( $\mu$ M) | Concentration of pure curcumin ( $\mu$ M) | Conc. of curcumin in micelles ( $\mu$ M) | Concentration ratios       |                                   |
|---------------------------------------|-------------------------------------------|------------------------------------------|----------------------------|-----------------------------------|
|                                       |                                           |                                          | Cisplatin to pure curcumin | Cisplatin to curcumin in micelles |
| 0.5                                   | 5                                         | 5                                        | 0.1                        | 0.1                               |
| 1                                     | 5                                         | 5                                        | 0.2                        | 0.2                               |
| 2.5                                   | 5                                         | 5                                        | 0.5                        | 0.5                               |
| 5                                     | 5                                         | 5                                        | 1                          | 1                                 |
| 10                                    | 5                                         | 5                                        | 2                          | 2                                 |
| 15                                    | 5                                         | 5                                        | 3                          | 3                                 |
| 25                                    | 5                                         | 5                                        | 5                          | 5                                 |
